# Supplementary material for: IgG Anti-high-Density Lipoproteins Antibodies Discriminate Between Arterial and Venous Events in Thrombotic Antiphospholipid Syndrome Patients
Source: PubMed Central journal article supplement (PMC6775216; doi:10.3389/fmed.2019.00211), 2019-09-26

## ONLINE SUPPLEMENTARY MATERIAL

**Supplementary Figure 1: ROC analysis.** The discriminative power of anti-HDL positivity to identify the presence of thrombosis was evaluated by means of a ROC curve (red line). AUC ROC [95% CI],  $p$ : 0.751 [0.633, 0.870],  $p < 0.001$ .

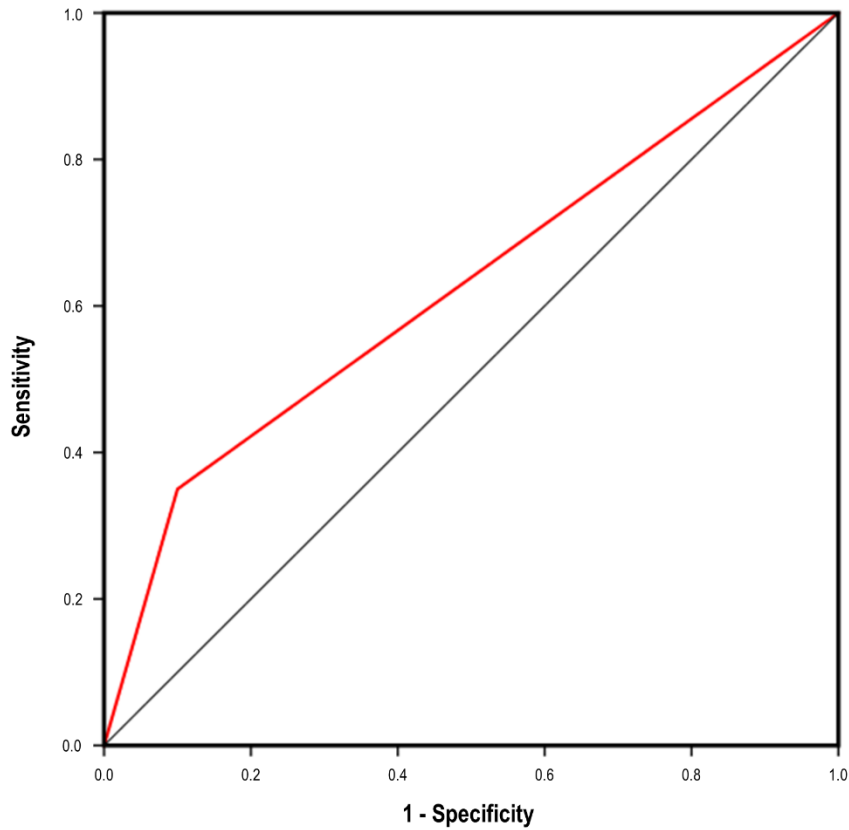

Supplement: Image_1.pdf [file Image_1.pdf]
